# Supplementary material for: Analysis of the intestinal microbiota using SOLiD 16S rRNA gene sequencing and SOLiD shotgun sequencing
Source: PubMed Central journal article supplement (PMC3852202; doi:10.1186/1471-2164-14-s5-s16), 2013-10-16

Legend: 16S-Sanger 16S-SOLID Shotgun-SOLID 16S-454

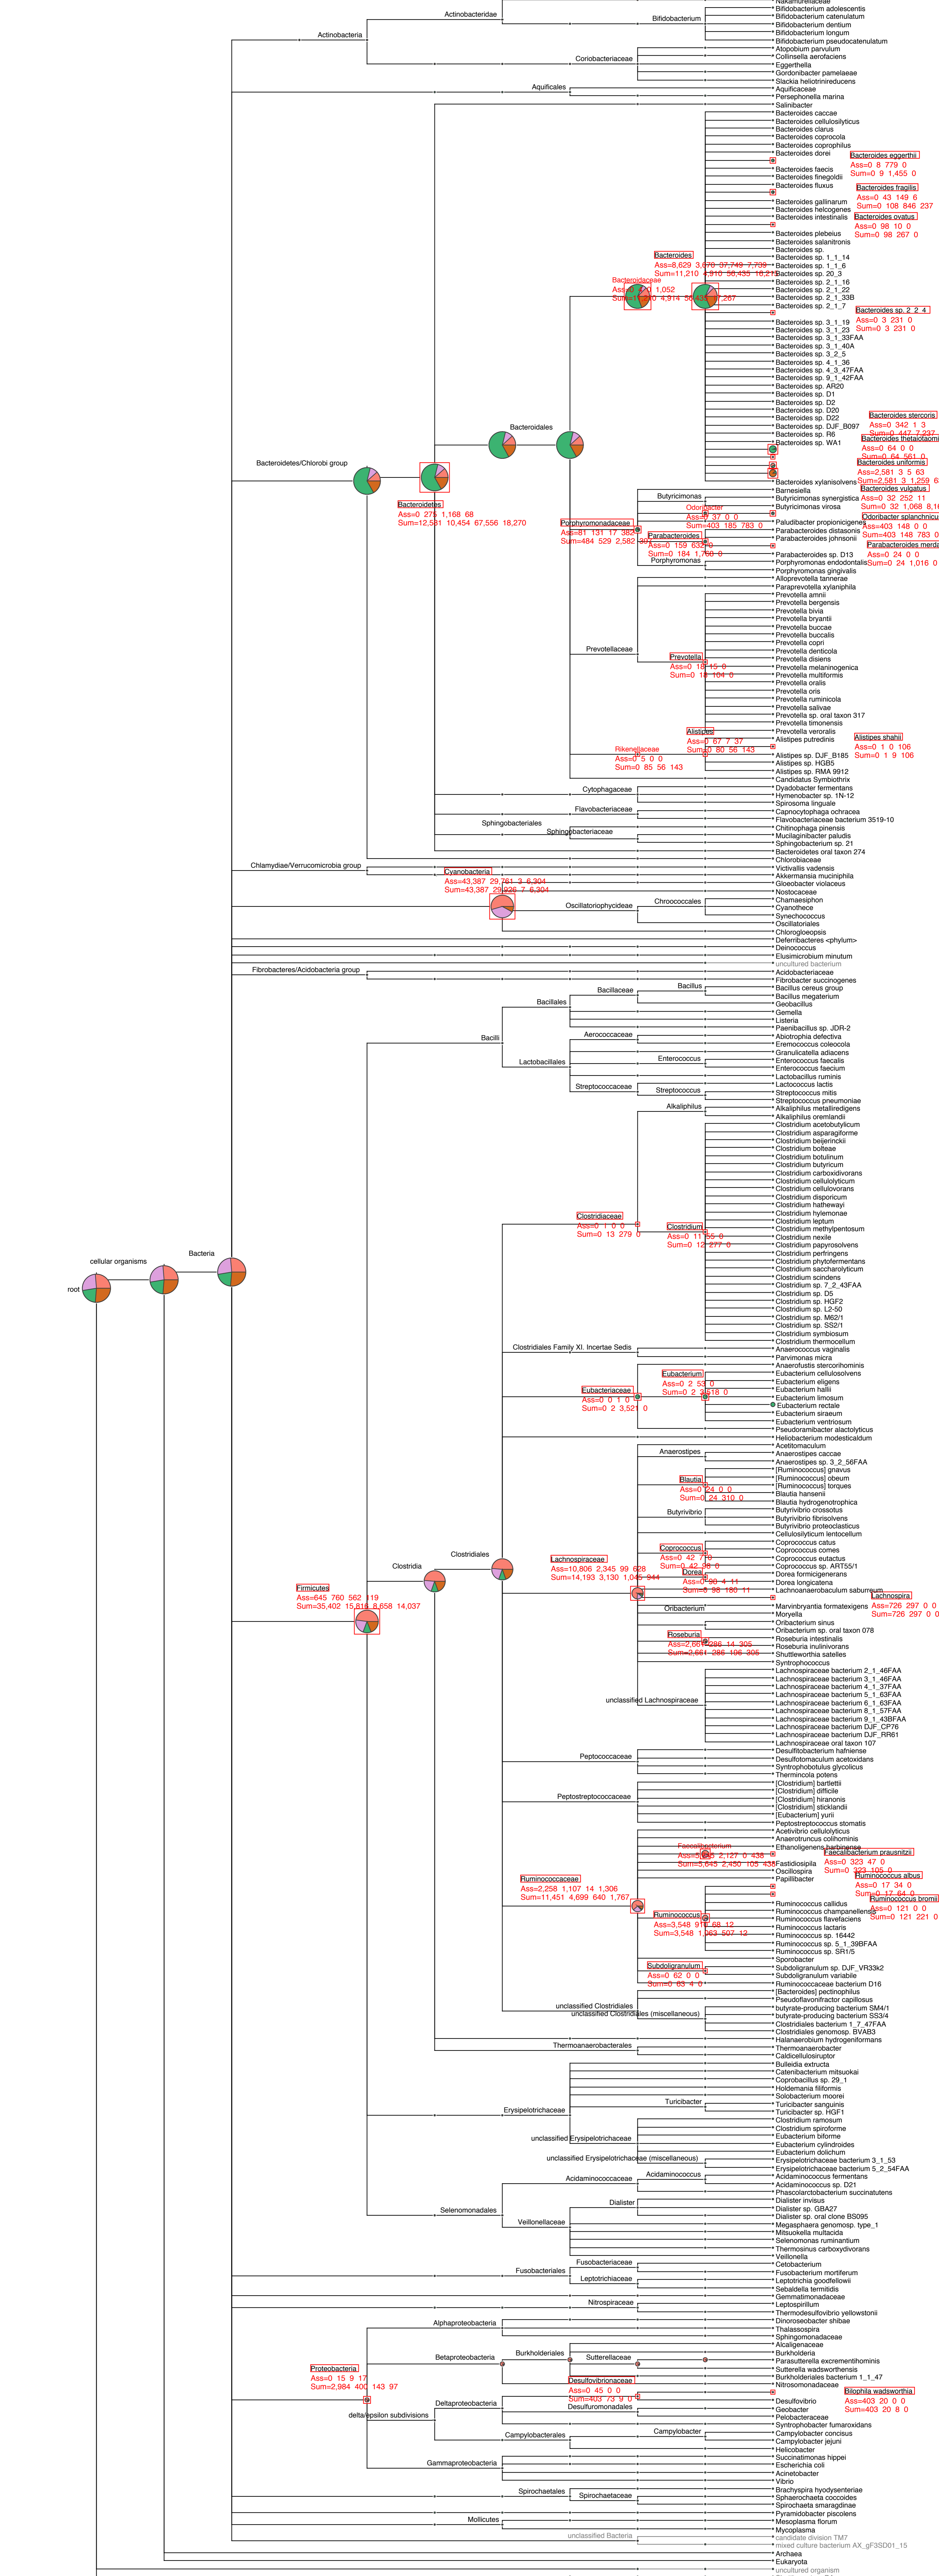

Supplement: 1471-2164-14-S5-S16-S1.pdf [file 1471-2164-14-S5-S16-S1.pdf]
