# Supplementary material for: Analysis of the intestinal microbiota using SOLiD 16S rRNA gene sequencing and SOLiD shotgun sequencing
Source: PubMed Central journal article supplement (PMC3852202; doi:10.1186/1471-2164-14-s5-s16), 2013-10-16
Supplement: 1471-2164-14-S5-S16-S2.pdf [file 1471-2164-14-S5-S16-S2.pdf]

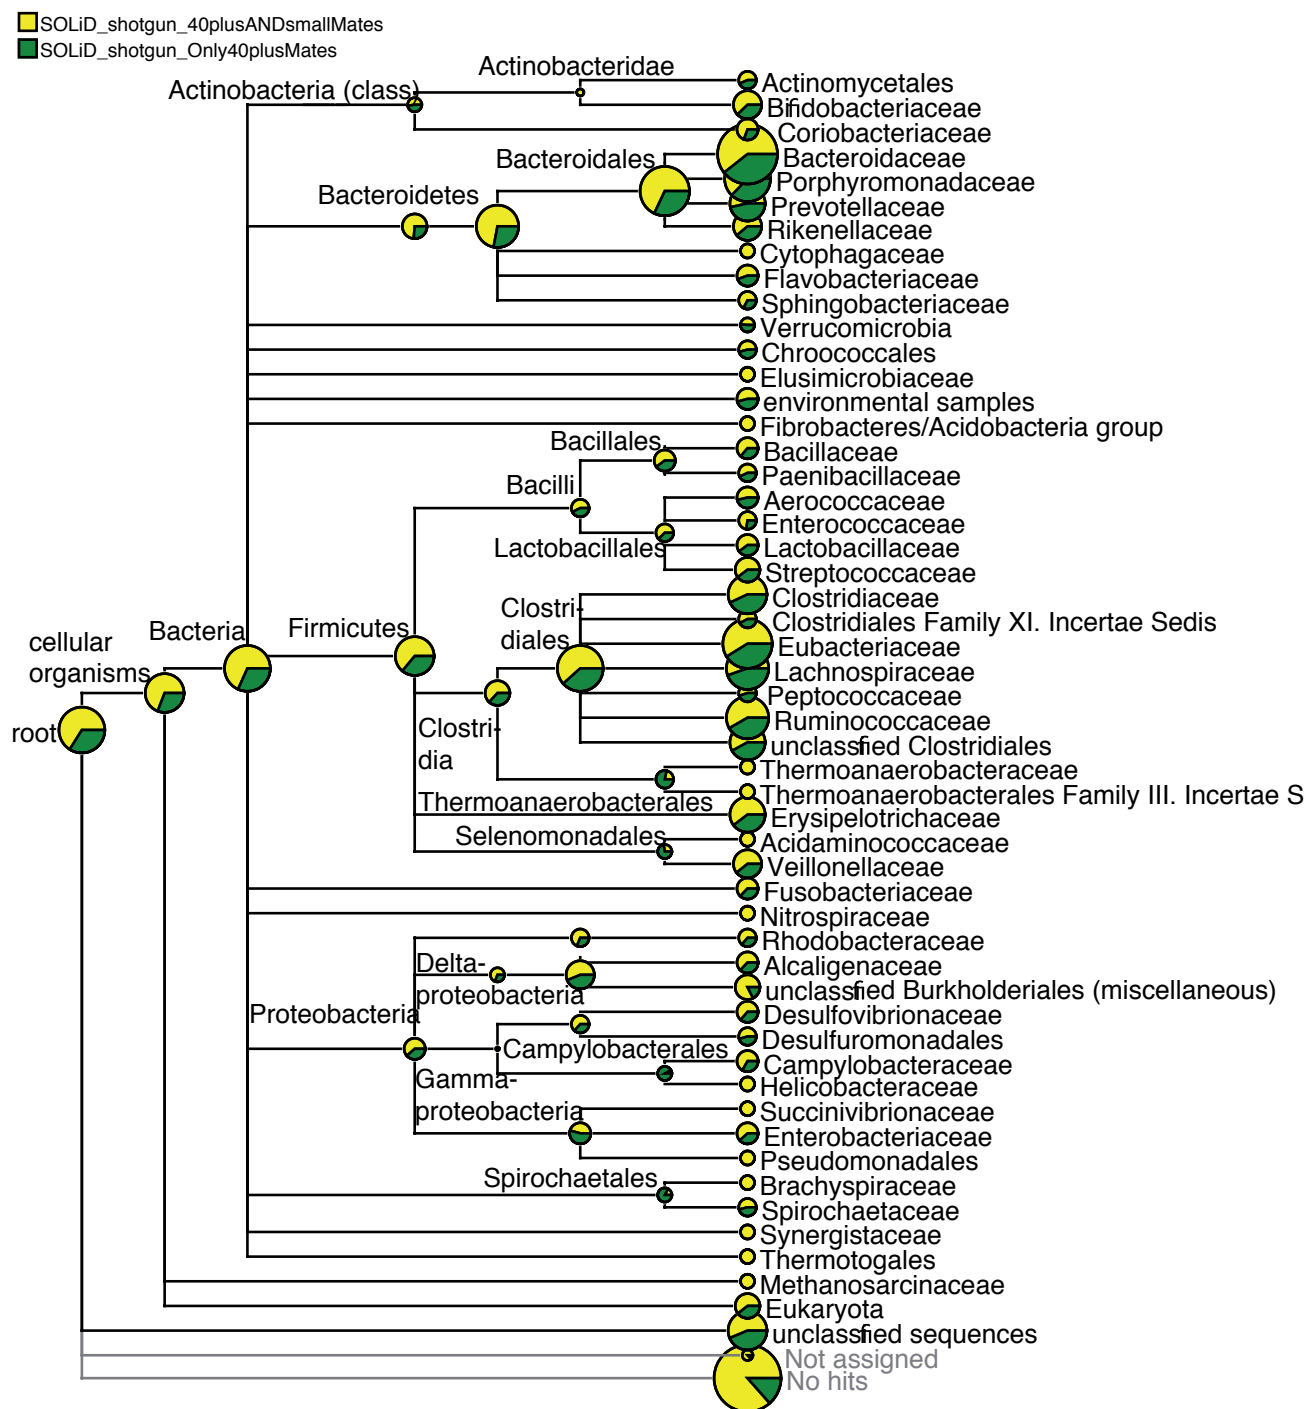

**Additional Figure 2: Absolute comparison tree view of Shotgun-SOLiD datasets considering long (40+ bp) and small mates.** Absolute comparison tree view using MEGAN 4 of ‘Shotgun-SOLiD’ datasets when considering all the mates for which both reads have a length of at least 40 bp (green) against all the mates for which at least one of the read is 40 bp or more (yellow).
