# Supplementary material for: Analysis of the intestinal microbiota using SOLiD 16S rRNA gene sequencing and SOLiD shotgun sequencing
Source: PubMed Central journal article supplement (PMC3852202; doi:10.1186/1471-2164-14-s5-s16), 2013-10-16
Supplement: 1471-2164-14-S5-S16-S4.pdf [file 1471-2164-14-S5-S16-S4.pdf]

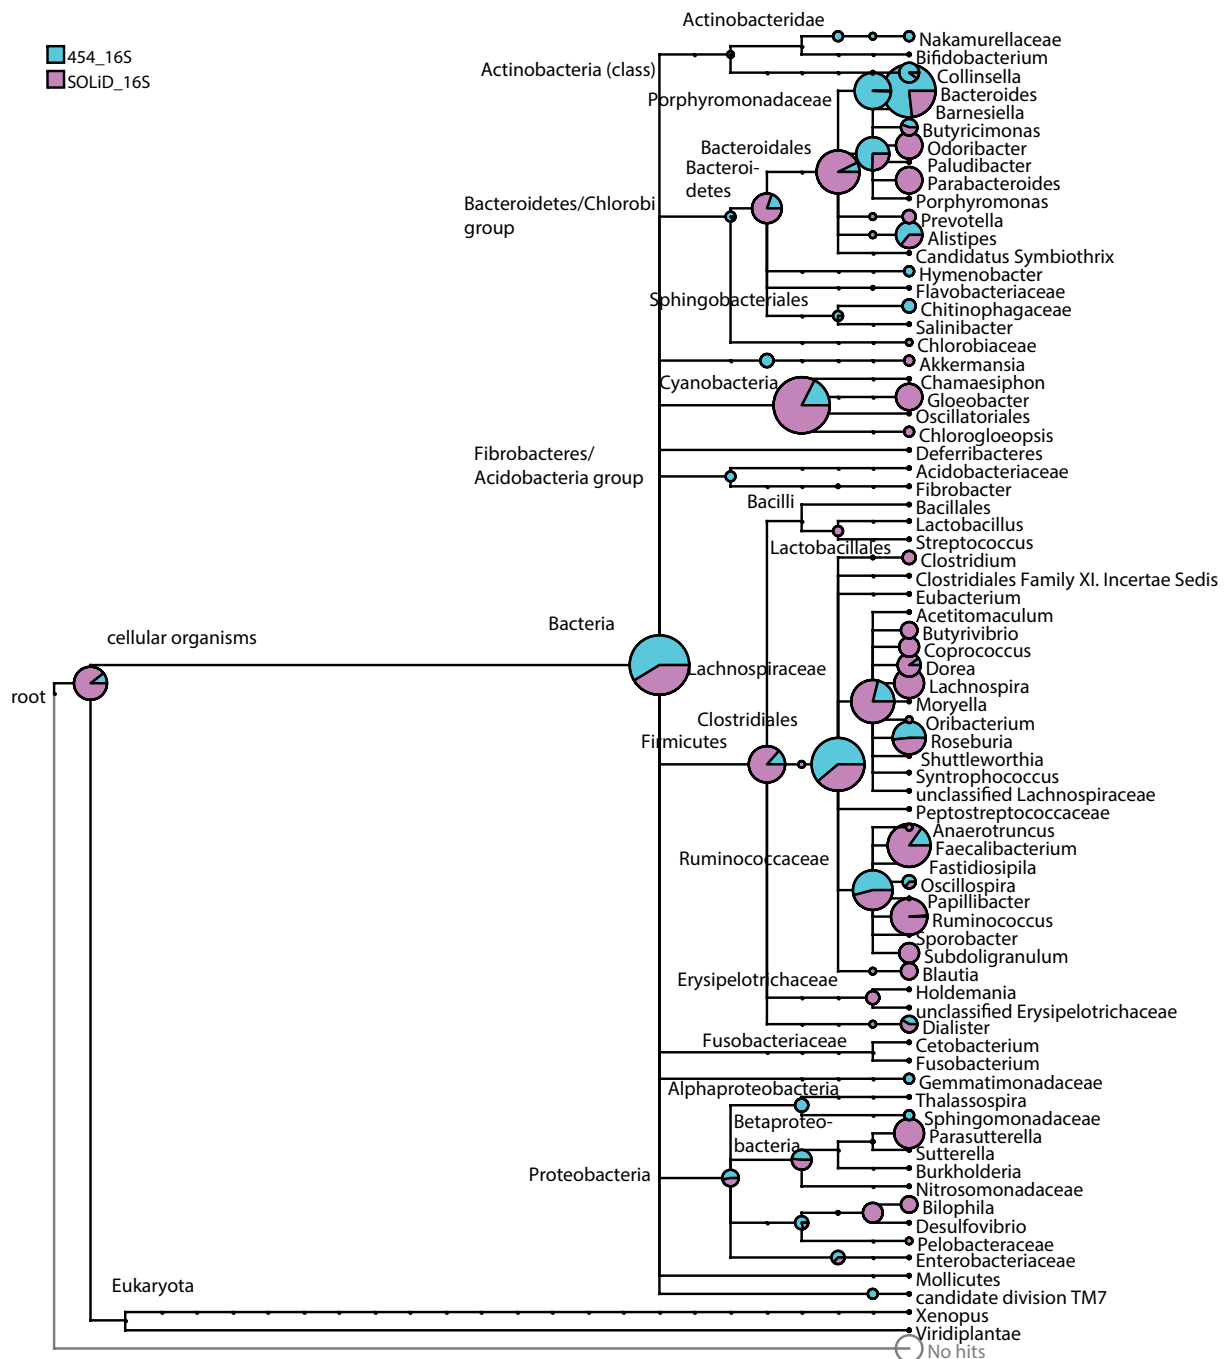

**Additional Figure 4: Detailed normalized comparison between 16S samples obtained using 454 and SOLiD sequencing.** Detailed normalized comparison tree obtained using MEGAN for '16S-454' dataset (cyan) and '16S-SOLiD' dataset (magenta) without considering the 'No hits' node. The tree is collapsed at 'genus' level of NCBI taxonomy. Circles are scaled logarithmically to indicate the number of summarized reads.
