# Supplementary material for: Analysis of the intestinal microbiota using SOLiD 16S rRNA gene sequencing and SOLiD shotgun sequencing
Source: PubMed Central journal article supplement (PMC3852202; doi:10.1186/1471-2164-14-s5-s16), 2013-10-16
Supplement: 1471-2164-14-S5-S16-S6.pdf [file 1471-2164-14-S5-S16-S6.pdf]

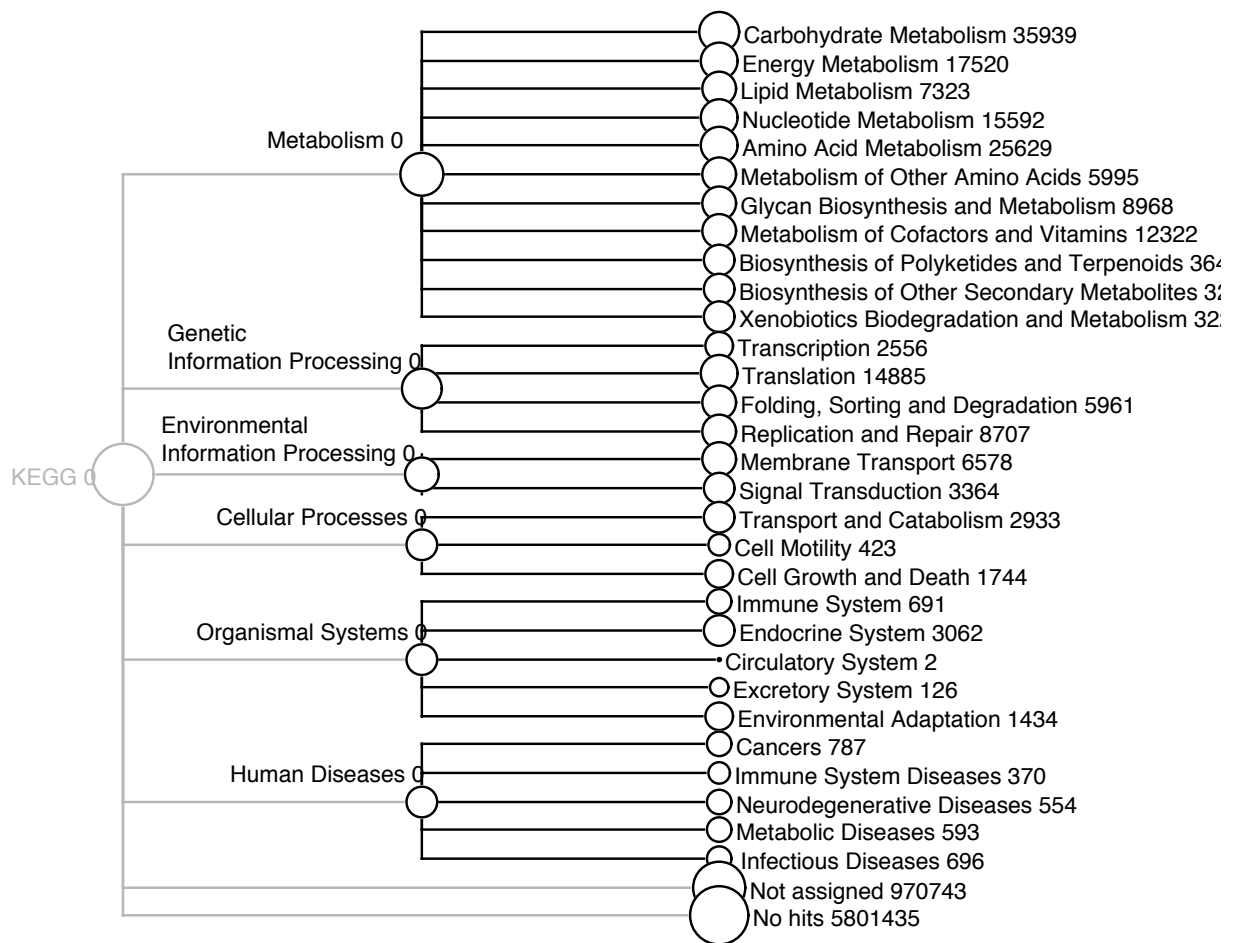

**Additional Figure 6: KEGG-based pathway analysis of ‘Shotgun-SOLiD’ dataset.**

KEGG-based pathway analysis of ‘Shotgun-SOLiD’ dataset computed using MEGAN.

Numbers in the tree indicate the number of assigned reads to each KEGG pathways. Circles are scaled logarithmically to indicate the number of assigned of reads.
