# Supplementary material for: Analysis of the intestinal microbiota using SOLiD 16S rRNA gene sequencing and SOLiD shotgun sequencing
Source: PubMed Central journal article supplement (PMC3852202; doi:10.1186/1471-2164-14-s5-s16), 2013-10-16
Supplement: 1471-2164-14-S5-S16-S7.pdf [file 1471-2164-14-S5-S16-S7.pdf]

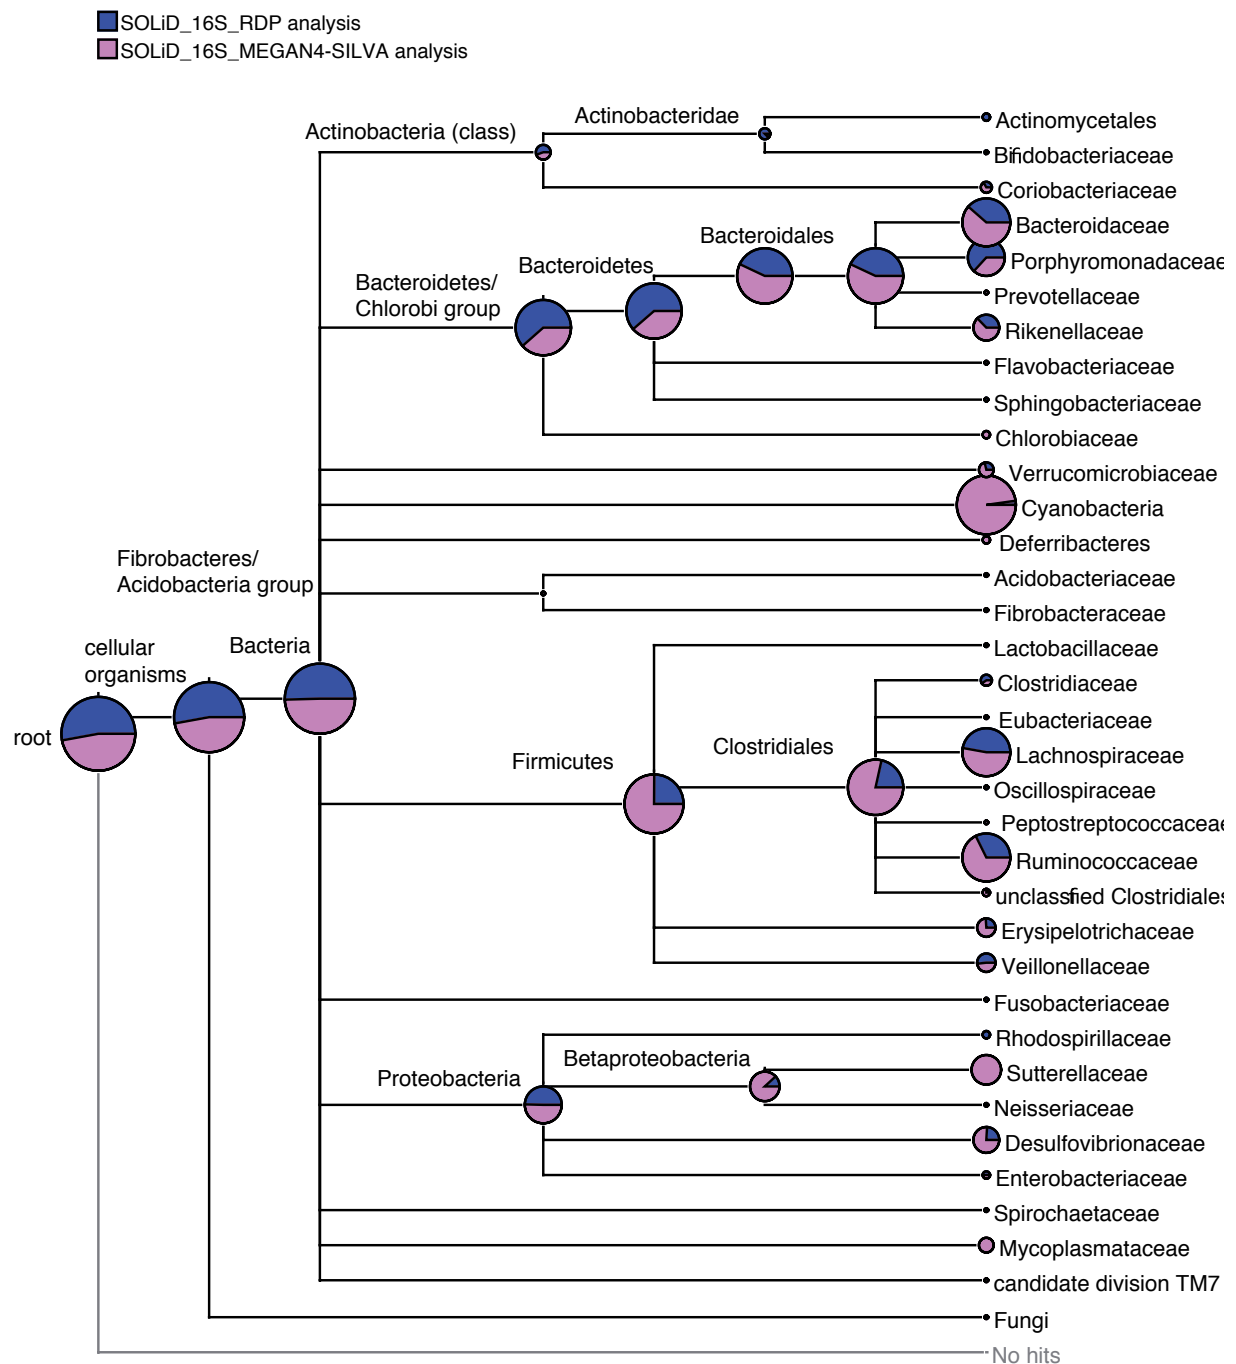

**Additional Figure 7: Comparison of three different 16S analyses.** Comparison of a MEGAN4 analysis based on a BLASTN comparison of the reads against the SILVA database (magenta) with a RDP analysis (blue).
